# Supplementary material
Source: PubMed Central journal article supplement (PMC6294906)
Supplement: pnas.1809662115.sapp.pdf [file pnas.1809662115.sapp.pdf]

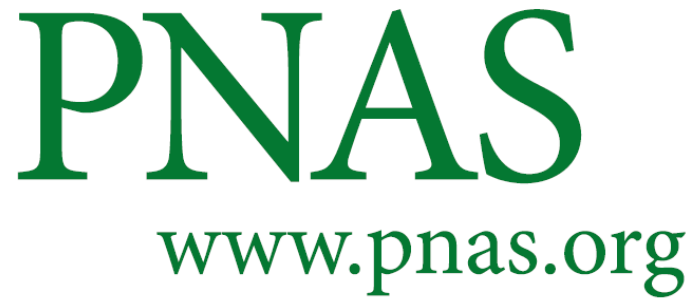

## Supplementary Information for

TRPV1 pore turret dictates distinct DkTx and capsaicin gating

Matan Geron, Rakesh Kumar, Wenchang Zhou, José D. Faraldo-Gómez,  
Valeria Vásquez, and Avi Priel

Co- corresponding authors:

Avi Priel

Email: [avip@ekmd.huji.ac.il](mailto:avip@ekmd.huji.ac.il)

Valeria Vásquez

Email: [vasquez@uthsc.edu](mailto:vasquez@uthsc.edu)

### **This PDF file includes:**

Figs. S1 to S7

Table S1

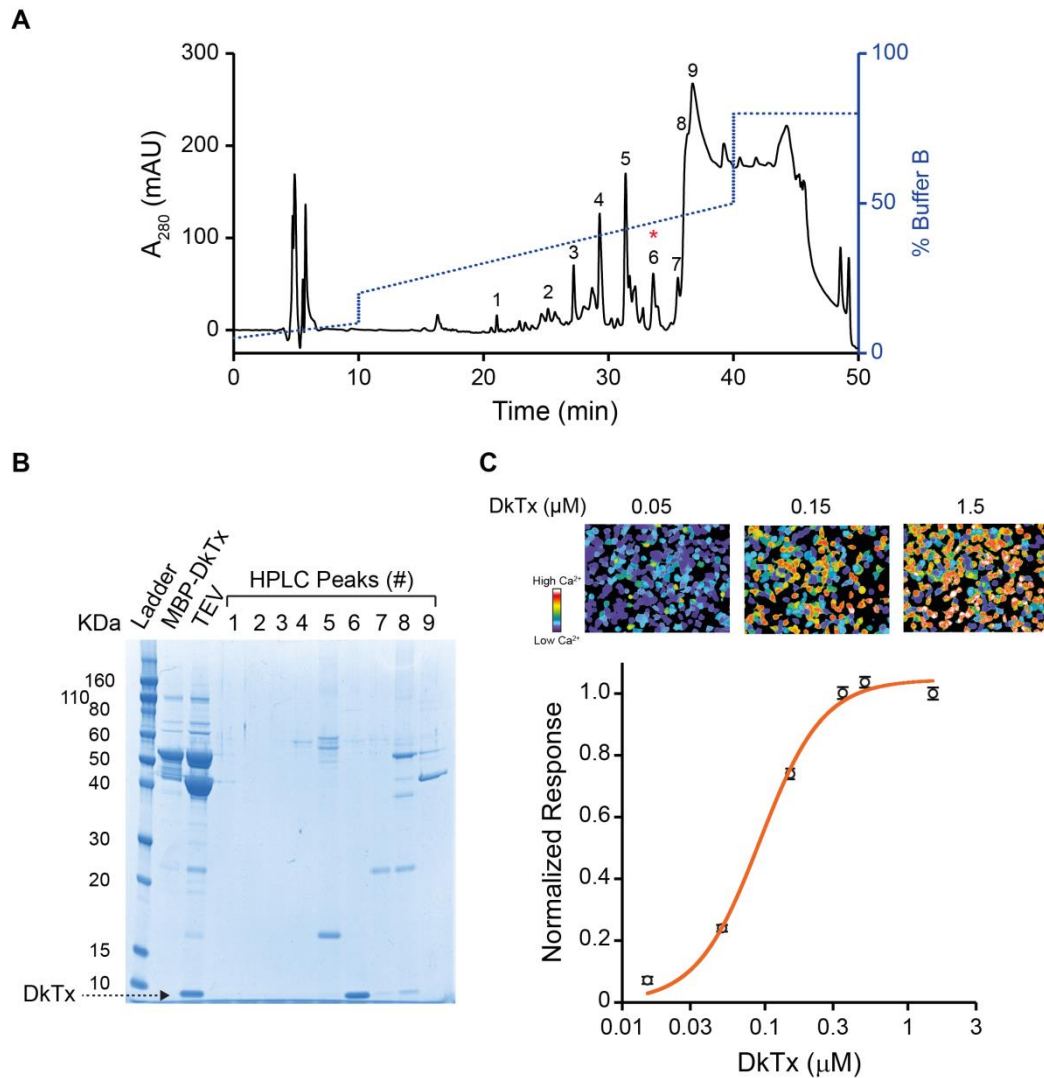

**Fig. S1.** Purification of bioactive recombinant DkTx. (A) Reversed-phase (C18) chromatogram of recombinant MBP-DkTx fusion protein after TEV protease cleavage. Red asterisk denotes the retention of the active recombinant DkTx. (B) SDS-PAGE analysis of DkTx purification. Lane 1, molecular weight markers. Lane 2, MBP-DkTx extracted from bacteria. Lane 3, TEV protease cleavage of proteins shown in lane 2. Lanes 4-12, HPLC fractions indicated in A. (C) *Top*: representative pseudo-colored images of cells after application of DkTx in the indicated concentrations. Scale bar indicates levels of intracellular calcium. *Bottom*: dose-response analysis for recombinant DkTx ( $EC_{50} = 0.11 \pm 0.01 \mu\text{M}$ ,  $n_H = 1.5 \pm 0.1$ ) in TREx HEK293T cells stably expressing rTRPV1 as determined by live-cell calcium imaging. Values are normalized to highest DkTx concentration (1.5  $\mu\text{M}$ ) - evoked responses. Each point represents an average of 50–150 cells.

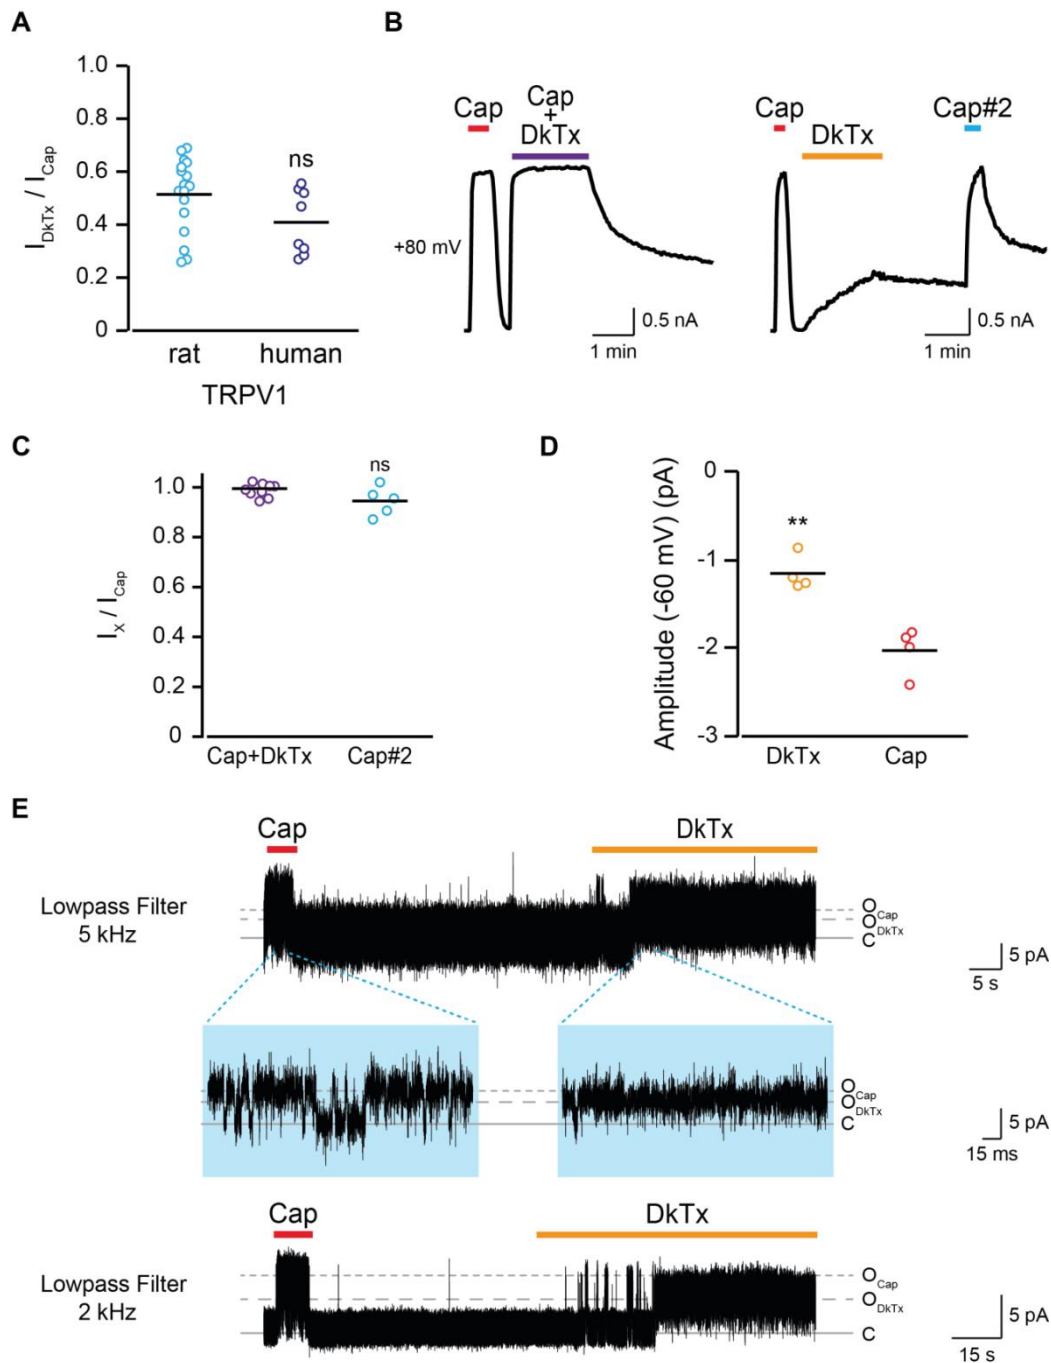

**Fig. S2.** DkTx evokes a moderate TRPV1 activation in various tested conditions. (A) Mean/scatter-dot plot representing the amplitude of DkTx-evoked (2  $\mu$ M) whole cell currents in TREx HEK293T cells transiently expressing rTRPV1 ('rat'; cyan circles) or hTRPV1 ('human'; dark blue circles) ( $V_m = +80$  mV) normalized to the current amplitude of the saturating capsaicin response (1  $\mu$ M) ( $n = 8-17$ ). Statistical significance is indicated as ns, not statistically significant (Unpaired student's *t*-test). (B) *Left*: representative whole-cell current traces from TREx HEK293T cells stably expressing rTRPV1 upon application of capsaicin (1  $\mu$ M; red bar) followed by co-application of DkTx (1  $\mu$ M) and capsaicin (1  $\mu$ M)

(purple bar) ( $n = 9$ ).  $V_m = +80$  mV. *Right*: representative whole-cell current trace from TReX HEK293T cells stably expressing rTRPV1 upon application of capsaicin ( $1 \mu\text{M}$ ; red bar), DkTx ( $1 \mu\text{M}$ ; orange bar) followed by a second application of capsaicin ('Cap#2';  $1 \mu\text{M}$ ; cyan bar) ( $n = 5$ ).  $V_m = +80$  mV. (C) Mean/scatter-dot plot representing the amplitude of whole-cell currents in TReX HEK293T cells stably expressing rTRPV1 ( $V_m = +80$  mV) of DkTx and capsaicin co-application ('Cap + DkTx'; both at  $1 \mu\text{M}$ ; purple circles) or capsaicin ( $1 \mu\text{M}$ ) applied following activation by DkTx (cyan circles), normalized to the current amplitude of the initial capsaicin response ( $1 \mu\text{M}$ ) ( $n = 5-9$ ). ns, not statistically significant (Paired student's t-test). (D) Mean/scatter-dot plot representing the amplitude of single-channel currents at the holding potential of  $-60$  mV evoked by DkTx ( $1 \mu\text{M}$ ) and capsaicin ( $1 \mu\text{M}$ ) ( $n = 4$ ). Statistical significance is indicated as  $**p \leq 0.01$  (Paired student's t-test). (E) *Top*: representative current recordings low-pass filtered at  $5$  kHz from an excised outside-out membrane patch of TReX HEK293T cells stably expressing rTRPV1 (treated as described in Fig. 1). Representative recording is shown after exposing the patch to capsaicin ( $1 \mu\text{M}$ ; red bar) and DkTx ( $1 \mu\text{M}$ ; orange bar) ( $V_m = +60$  mV) ( $n = 3$ ). Blue background insets show higher magnification of indicated  $0.2$  s of capsaicin or DkTx -evoked responses. *Bottom*: representative current recordings low-pass filtered at  $2$  kHz from an excised outside-out membrane patch of TReX HEK293T cells stably expressing rTRPV1 (treated as described in Fig. 1). Representative recording is shown after exposing the patch to capsaicin ( $1 \mu\text{M}$ ; red bar) and DkTx ( $1 \mu\text{M}$ ; orange bar) ( $V_m = +60$  mV) ( $n = 6$ ).

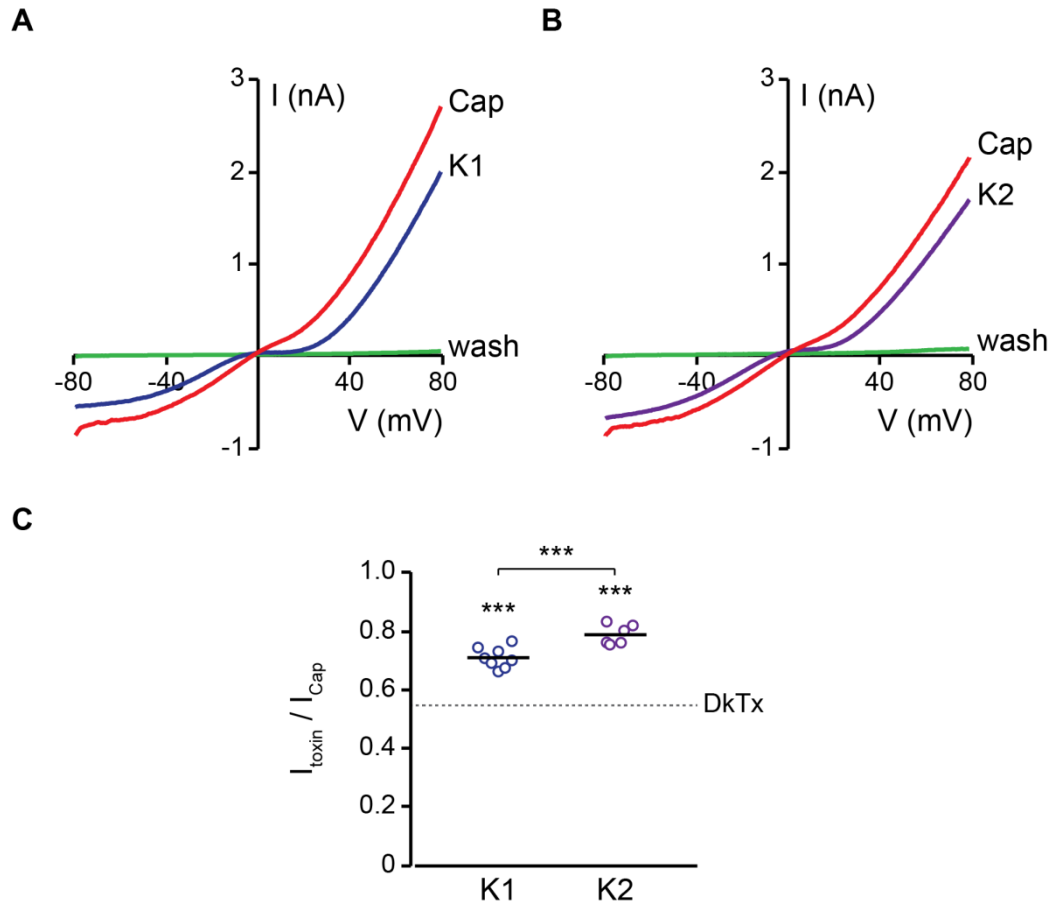

**Fig. S3.** The single knots, K1 and K2, evoke higher current amplitude in whole-cell recordings in respect to the full-length DkTx. (A) Representative current-voltage relationship traces recorded using the whole-cell configuration of the patch-clamp technique (in  $1 \text{ s}^{-1}$  voltage-ramps between -80 and +80 mV) from TREx HEK293T cells stably expressing rTRPV1. Cells were exposed to capsaicin ('Cap';  $1 \mu\text{M}$ ; red line) followed by application of K1 ('K1';  $300 \mu\text{M}$ ; blue line) ( $n = 8$ ). (B) Representative current-voltage relationship traces from TREx HEK293T cells stably expressing rTRPV1 (treated as in A). Cells were exposed to capsaicin ('Cap';  $1 \mu\text{M}$ ; red line) followed by application of K2 ('K2';  $50 \mu\text{M}$ ; purple line) ( $n = 6$ ). (C) Mean/scatter-dot plot representing the ratio between the indicated toxin and capsaicin-evoked whole-cell current amplitudes at +80 mV ( $n = 6-8$ ). The dashed line indicates the average ratio of DkTx and capsaicin-evoked peak amplitudes at +80 mV. Statistical significance between normalized responses of K1, K2, and wild-type DkTx are indicated as  $***p \leq 0.001$  (ANOVA followed by a multiple comparison test).

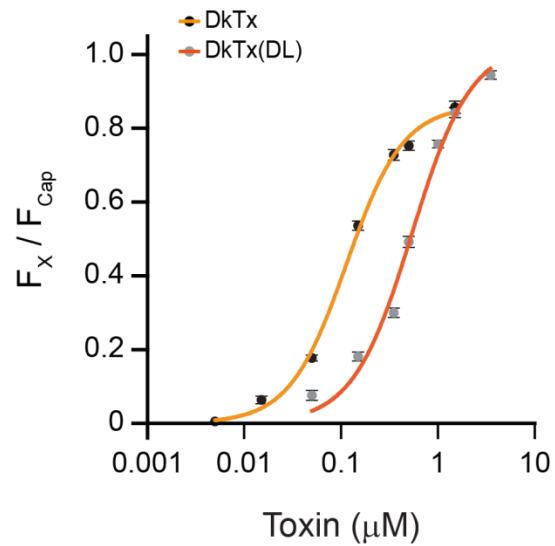

**Fig. S4.** DkTx(DL) is less potent than wild-type toxin. Dose-response analysis for DkTx(DL) ( $EC_{50} = 0.54 \pm 0.08 \mu\text{M}$ ,  $n_H = 1.4 \pm 0.2$ ) and DkTx ( $EC_{50} = 0.11 \pm 0.01 \mu\text{M}$ ,  $n_H = 1.5 \pm 0.1$ ) in TREx HEK293T cells stably expressing rTRPV1 as determined by calcium imaging. Values are normalized to saturating capsaicin (1  $\mu\text{M}$ ) evoked responses. Each point represents an average of 50–150 cells.

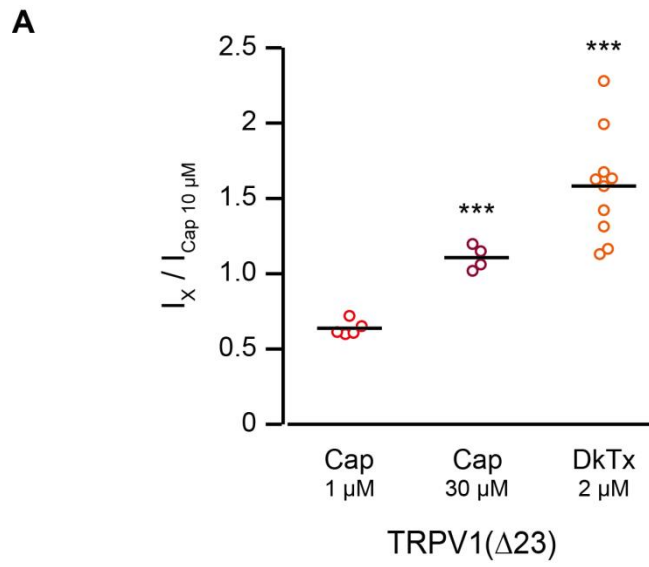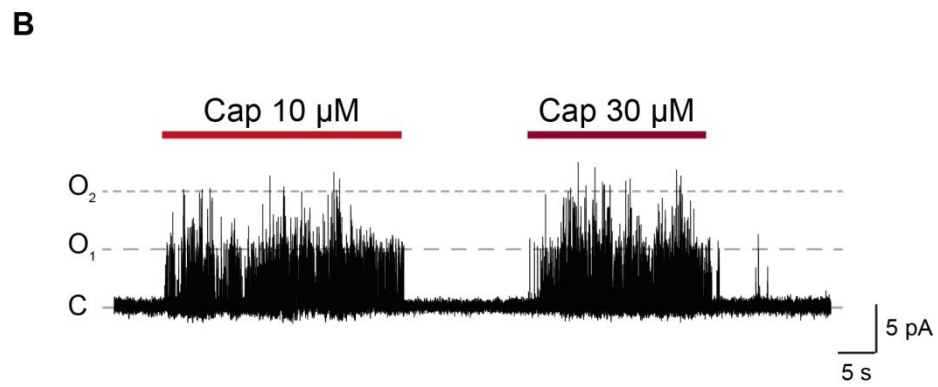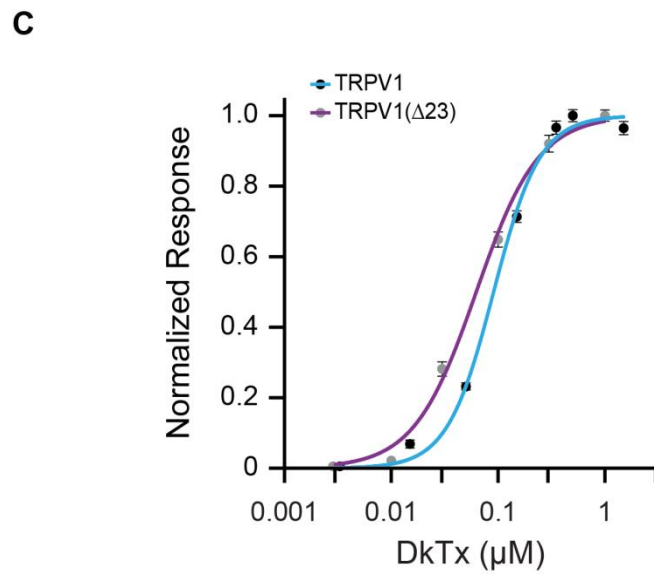

**Fig. S5.** While TRPV1 $\Delta$ 23 is less sensitive to capsaicin, DkTx potency is preserved in this mutated channel. (A) Mean/scatter-dot plot representing the ratio between the whole-cell current amplitudes of 1  $\mu$ M capsaicin ('Cap 1  $\mu$ M'; red circles), 30  $\mu$ M capsaicin ('Cap 30  $\mu$ M'; dark red circles), 2  $\mu$ M DkTx (orange circles) and 10  $\mu$ M capsaicin in TReX HEK293T cells transiently expressing TRPV1 $\Delta$ 23 ( $V_m = +80$  mV) ( $n = 4-10$ ). High capsaicin concentration and DkTx normalized responses were compared to the 1  $\mu$ M capsaicin normalized response. Statistical significance is indicated as \*\*\* $p \leq 0.001$  (ANOVA followed by a multiple comparison test). (B) Representative current recording from an excised outside-out membrane patch of TReX HEK293T cells transiently expressing TRPV1 $\Delta$ 23 (treated as described in Fig. 1). A representative recording is shown after exposing the patch to 10  $\mu$ M capsaicin (red bar) and 30  $\mu$ M capsaicin (dark red bar) ( $V_m = +60$  mV) ( $n = 4$ ). (C) Dose-response analysis for DkTx in TReX HEK293T cells transiently expressing rTRPV1 (TRPV1:  $EC_{50} = 90 \pm 5$  nM,  $n_H = 2 \pm 0.2$ ) or TRPV1 $\Delta$ 23 (TRPV1 $\Delta$ 23:  $EC_{50} = 60 \pm 4$  nM,  $n_H = 1.5 \pm 0.1$ ) as determined by live-cell calcium imaging. Values are normalized to the maximal DkTx-evoked response in each construct. Each point represents an average of 50–100 cells.



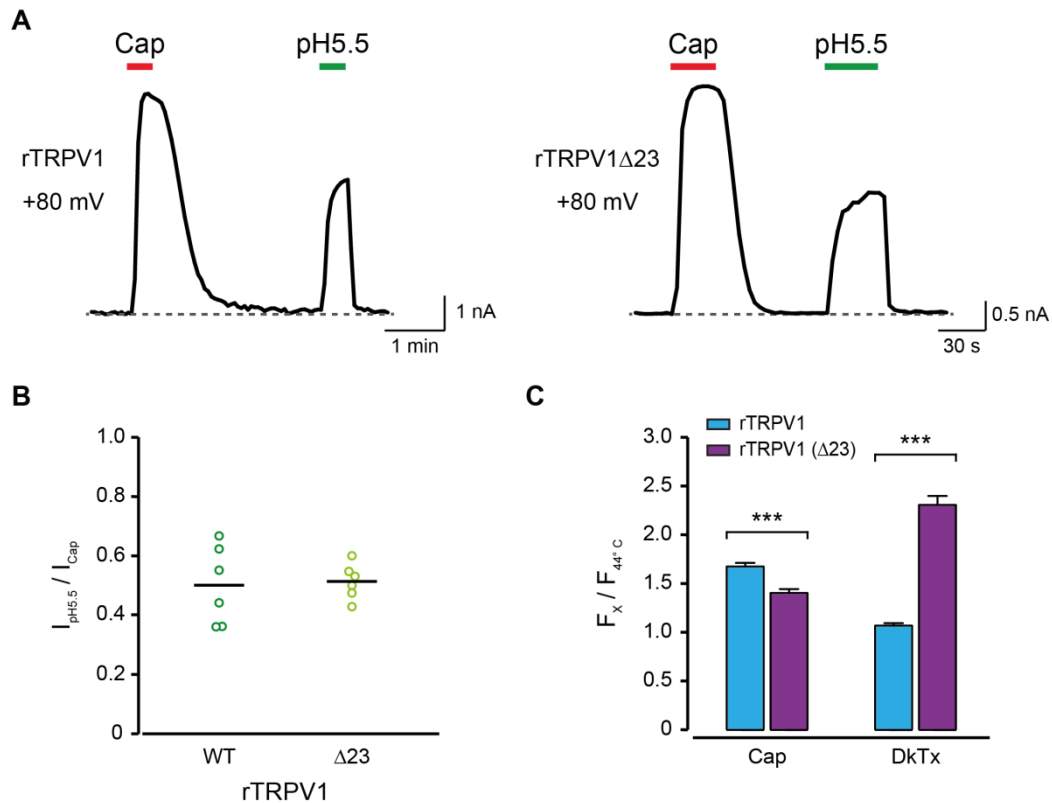

**Fig. S6.** pH and heat -evoked responses are reduced in TRPV1Δ23. (A) *Left*: representative whole-cell current trace from CHO cells transiently expressing rTRPV1 upon application of capsaicin (1 μM; red bar) and pH 5.5 (green bar) (n = 6).  $V_m = +80$  mV. *Right*: representative whole-cell current trace from CHO cells transiently expressing rTRPV1Δ23 upon application of capsaicin (1 μM; red bar), and pH 5.5 (green bar) (n = 6).  $V_m = +80$  mV. (B) Mean/scatter-dot plot representing the ratio between pH 5.5 and capsaicin-evoked whole-cell current amplitudes in CHO cells transiently expressing rTRPV1 ('wt'; dark green circles) or TRPV1Δ23 ('Δ23'; light green circles) ( $V_m = +80$  mV) (n = 6). Statistical significance is indicated as ns, not statistically significant (Unpaired student's *t*-test). Note that the ratio between pH 5.5 and capsaicin responses in TRPV1Δ23 is comparable to wild-type. As the capsaicin-evoked response is reduced in the mutated channel, thus the pH 5.5 response is also reduced proportionally in TRPV1Δ23. (C) Bar graph represents the average ( $\pm$  SEM) ratio of the calcium response evoked by capsaicin (1 μM) or DkTx (1 μM) relative to heat (44°C) in TReX HEK293T cells transiently expressing either TRPV1 (cyan bars) or TRPV1Δ23 (purple bars) as determined by live-cell calcium imaging. Each bar represents an average of 50–150 cells. Statistical significance is indicated as \*\*\* $p \leq 0.001$  (ANOVA followed by a multiple comparison test).

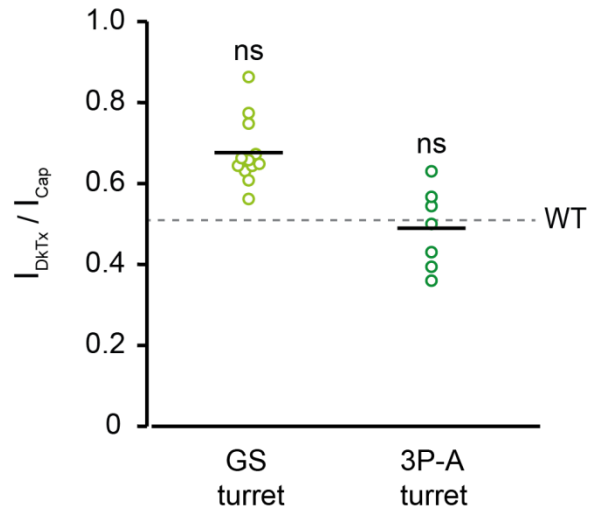

**Fig. S7.** Substitution mutations in the TRPV1 pore turret do not increase DkTx-evoked current amplitude. Mean/scatter-dot plot representing the ratio between the DkTx (2  $\mu$ M) and capsaicin (1  $\mu$ M) -evoked whole-cell current amplitudes in TReX HEK293T cells transiently expressing rTRPV1 with an artificial pore turret ('GS turret'; light green circles) or rTRPV1 containing three point mutations (P608A, P613A, P623A) in its turret ('3P-A turret'; dark green circles) ( $V_m = +80$  mV) ( $n = 7-12$ ). The dashed line indicates the average ratio of DkTx and capsaicin-evoked peak amplitudes at +80 mV in wild-type rTRPV1. Statistical significance between normalized responses in mutated constructs and wild-type TRPV1 is indicated as ns, not statistically significant (ANOVA followed by a multiple comparison test).

**Table S1. Whole cell and single-channel properties of toxin-evoked rTRPV1 activation**

| Construct   | Toxin     | Whole cell                                          |                                                     |                                             | Single Channel                       |                          |
|-------------|-----------|-----------------------------------------------------|-----------------------------------------------------|---------------------------------------------|--------------------------------------|--------------------------|
|             |           | $I_{Tx(\text{peak})} / I_{\text{cap}(\text{peak})}$ | $I_{Tx(\text{wash})} / I_{\text{cap}(\text{peak})}$ | $I_{Tx(\text{wash})} / I_{Tx(\text{peak})}$ | $I_{Tx} / I_{\text{cap}}$            | Po                       |
| rTRPV1      | DkTx      | $0.56 \pm 0.02^{***}$<br>n = 7                      | $0.51 \pm 0.03^{***}$<br>n = 7                      | $0.91 \pm 0.03$<br>n = 7                    | $0.68 \pm 0.04^{***}$<br>n = 6       | $0.99 \pm 0.01$<br>n = 6 |
|             | K1        | $0.71 \pm 0.01^{***, \$\$}$<br>n = 8                | NSS<br>n = 8                                        | NSS<br>n = 8                                | $0.75 \pm 0.01^{***, \$}$<br>n = 6   | $0.95 \pm 0.02$<br>n = 6 |
|             | K2        | $0.79 \pm 0.01^{***, \$\$}$<br>n = 6                | NSS<br>n = 6                                        | NSS<br>n = 6                                | $0.89 \pm 0.01^{***, \$\$}$<br>n = 7 | $0.88 \pm 0.03$<br>n = 7 |
|             | K1K1      | ND                                                  | ND                                                  | ND                                          | $0.58 \pm 0.01^{***, \$\$}$<br>n = 7 | $0.92 \pm 0.05$<br>n = 7 |
|             | K2K2      | ND                                                  | ND                                                  | ND                                          | $0.64 \pm 0.01^{***}$<br>n = 5       | $0.93 \pm 0.02$<br>n = 5 |
|             | DkTx (DL) | $0.80 \pm 0.04^{**, \$\$}$<br>n = 7                 | $0.60 \pm 0.06^{***}$<br>n = 7                      | $0.73 \pm 0.06^{\$}$<br>n = 7               | $0.77 \pm 0.03^{***, \$}$<br>n = 8   | $0.99 \pm 0.01$<br>n = 8 |
| Cryo rTRPV1 | DkTx      | $3.25 \pm 0.76^{***, \$\$}$<br>n=4                  | $3.01 \pm 0.79^{***, \$\$}$<br>n=3                  | $0.84 \pm 0.01$<br>n=3                      | $1.18 \pm 0.11^{\$}$<br>n=4          | $0.99 \pm 0.01$<br>n=4   |
| rTRPV1Δ23   | DkTx      | $2.67 \pm 0.16^{***, \$\$}$<br>n=12                 | $1.89 \pm 0.31^{***, \$\$}$<br>n=8                  | $0.78 \pm 0.05^{\$}$<br>n=8                 | $1.15 \pm 0.07^{\$}$<br>n=4          | $0.93 \pm 0.03$<br>n=4   |

Tx, toxin (at the relevant saturating concentration)

cap, capsaicin (1 μM)

peak, maximal amplitude

wash, steady-state current following 2 minutes of toxin washout

I, current

Po, open probability

ND, not determined

NSS, no steady-state current

\*, statistical significance between toxin and maximal capsaicin response (paired *t* test; \*\* *p* < 0.01 and \*\*\* *p* < 0.001)

§, statistical significance between toxin and the relevant DkTx response (unpaired *t* test; § *p* < 0.05, §§ *p* < 0.01 and §§§ *p* < 0.001)
